# Supplementary material for: Synthesis and visible light photocatalytic property of polyhedron-shaped AgNbO3
Source: Royal Society of Chemistry journal article supplement (doi:10.1039/b906799j), 2009-01-01
Supplement: b906799j.pdf [file b906799j.pdf]

Supporting information:

## **Synthesis and Visible Light Photocatalytic Property of**

### **Polygon-shaped AgNbO<sub>3</sub>**

Guoqiang Li,<sup>a</sup> Shicheng Yan,<sup>a</sup> Zhiqiang Wang,<sup>a</sup> Xiangyan Wang,<sup>a</sup> Zhaosheng Li<sup>a</sup>,  
Jinhua Ye<sup>b</sup> and Zhigang Zou<sup>a,\*</sup>,

<sup>a</sup> *National Laboratory of Solid State Microstructures, Nanjing University,  
Nanjing 210093, People's Republic of China.*

<sup>b</sup> *Photocatalytic Materials Center (PCMC), National Institute for Materials  
Science (NIMS), 1-2-1 Sengen, Tsukuba, Ibaraki 305-0047, Japan.*

\* Corresponding author: E-mail address: [zgzou@nju.edu.cn](mailto:zgzou@nju.edu.cn), Tel:  
+86-25-8368-6630; Fax: +86-25-8368-6632.

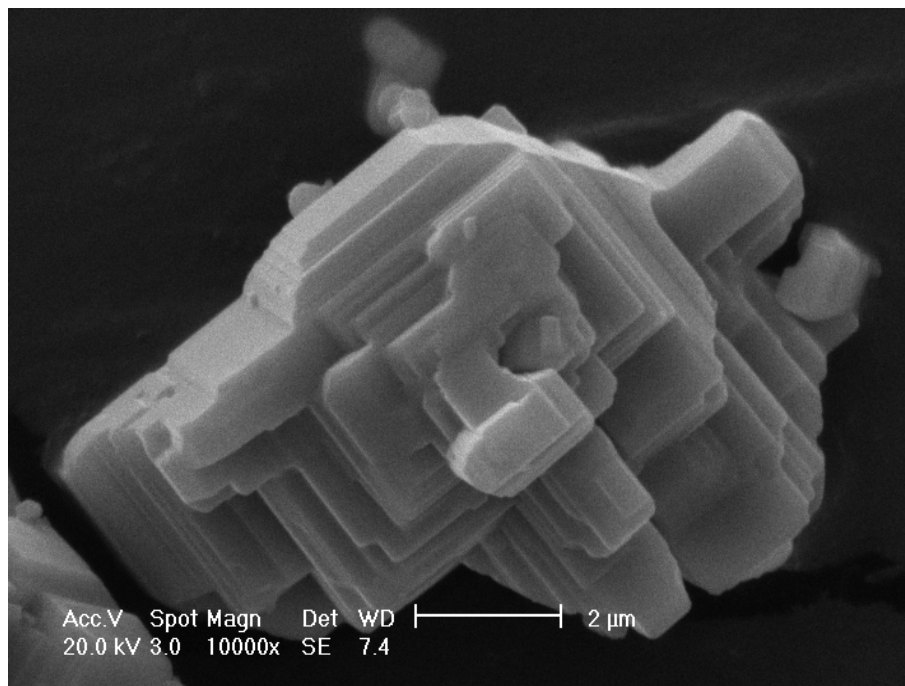

**Figure S1.** SEM image of Cu:AN(ST) in small enlargement factor. Many steps exist on the surface.

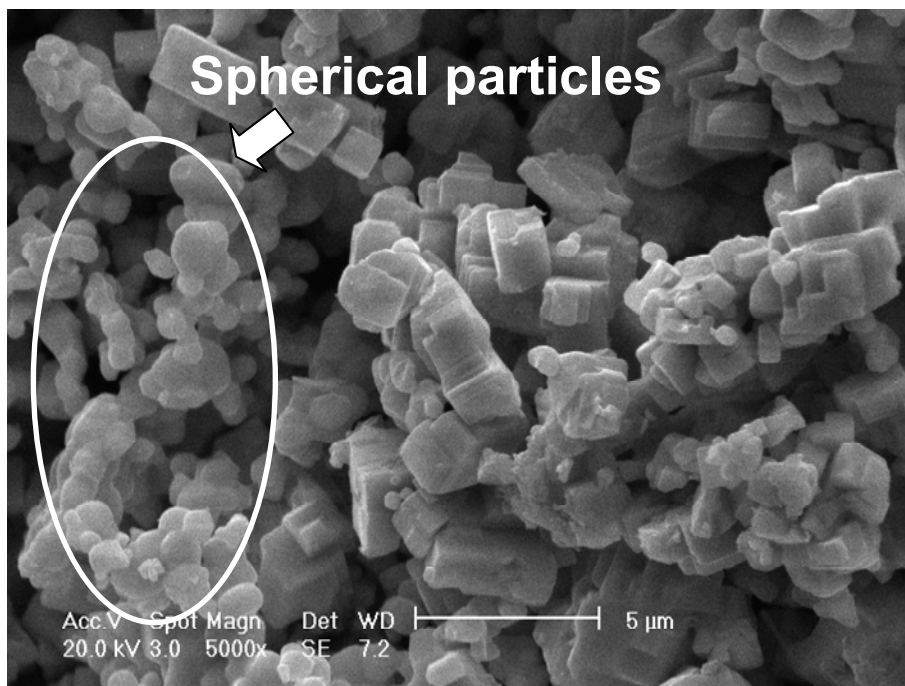

**Figure S2.** SEM image of Cu:AN(ST) with small enlargement factor. In the circle, the particles show spherical morphology.

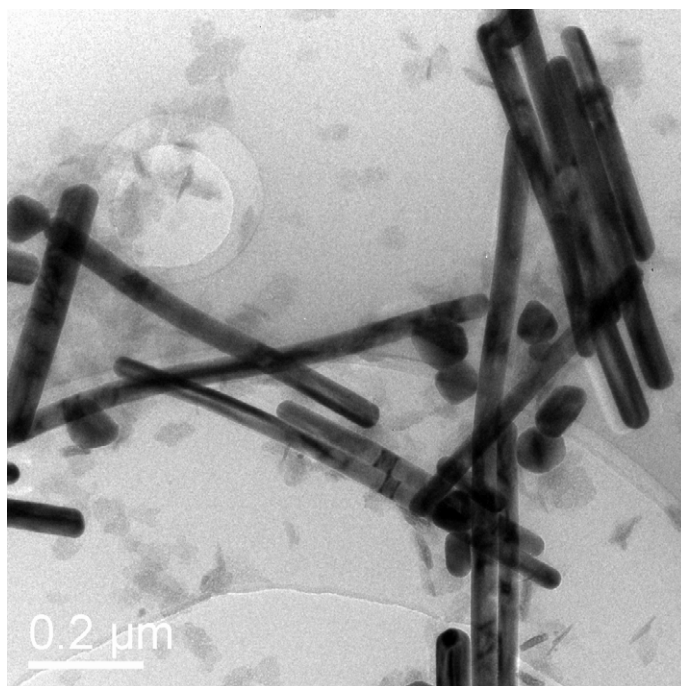

**Figure S3.** TEM image of silver nanowires. Also there are some spherical particles.

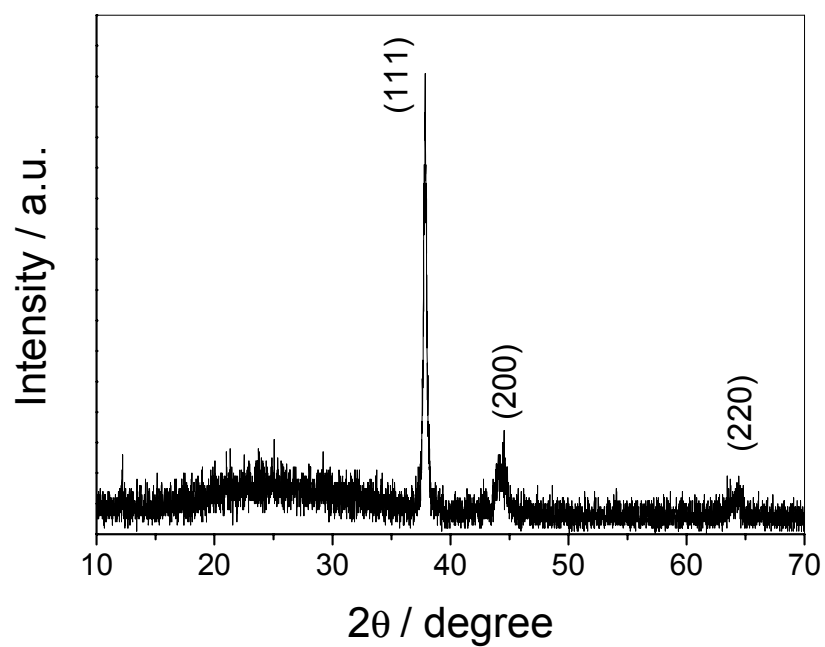

**Figure S4.** X-ray diffraction patterns of the solution precursor. The peak could be indexed as the cubic silver (PDF#04-0783).

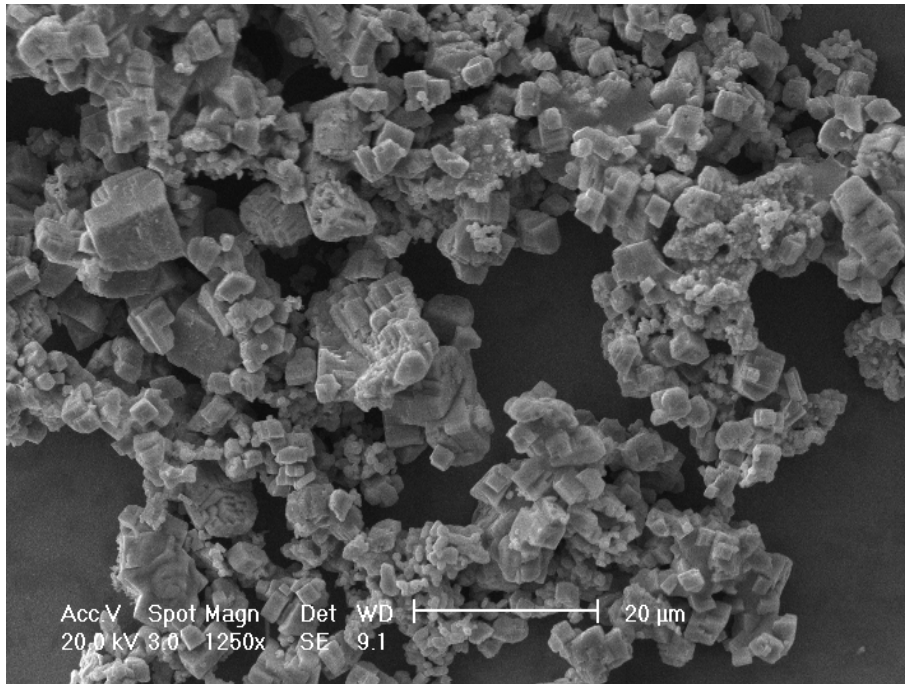

**Figure S5.** SEM image of Cu:AN(L) with small enlargement factor. Most of particles show polygon-shaped morphology, although there are some aggregations.

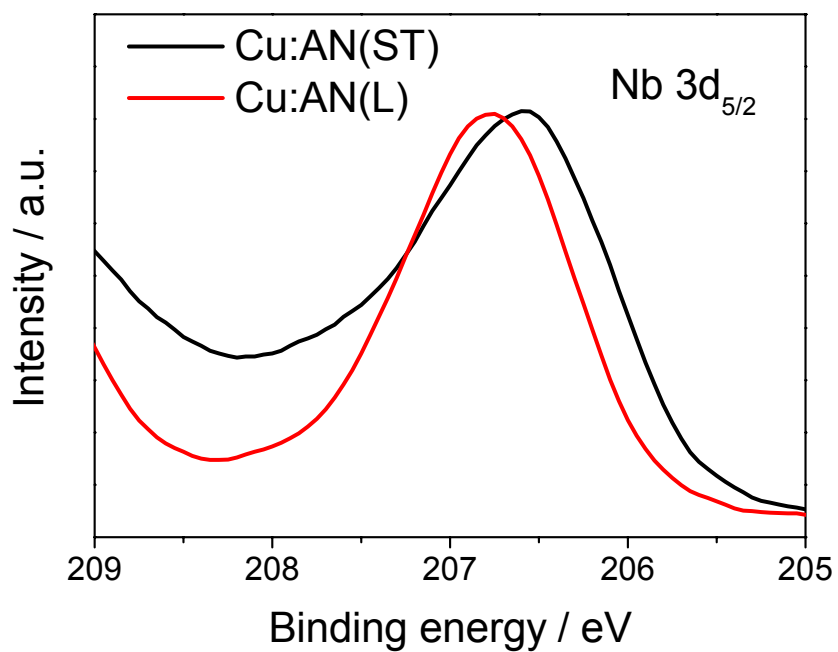

**Figure S6.** XPS line of Nb 3d<sub>5/2</sub> obtained from Cu:AN(ST) and Cu:AN(L).
